# Supplementary material for: Ultrafast Synthesis of Multifunctional Submicrometer Hollow Silica Spheres in Microfluidic Spiral Channels
Source: PubMed Central journal article supplement (PMC5626769; doi:10.1038/s41598-017-12856-9), 2017-10-03
Supplement: 41598_2017_12856_MOESM1_ESM.pdf [file 41598_2017_12856_MOESM1_ESM.pdf]

Supporting Information

# **Ultrafast Synthesis of Multifunctional Submicrometer Hollow Silica Spheres in Microfluidic Spiral Channels**

**Yuan Nie<sup>+</sup>, Nanjing Hao<sup>+</sup>, and John X. J. Zhang\***

Thayer School of Engineering, Dartmouth College, 14 Engineering Drive, Hanover, New  
Hampshire 03755, United States

\*E-mail: [john.zhang@dartmouth.edu](mailto:john.zhang@dartmouth.edu)

<sup>+</sup>These two authors contributed equally in this study.

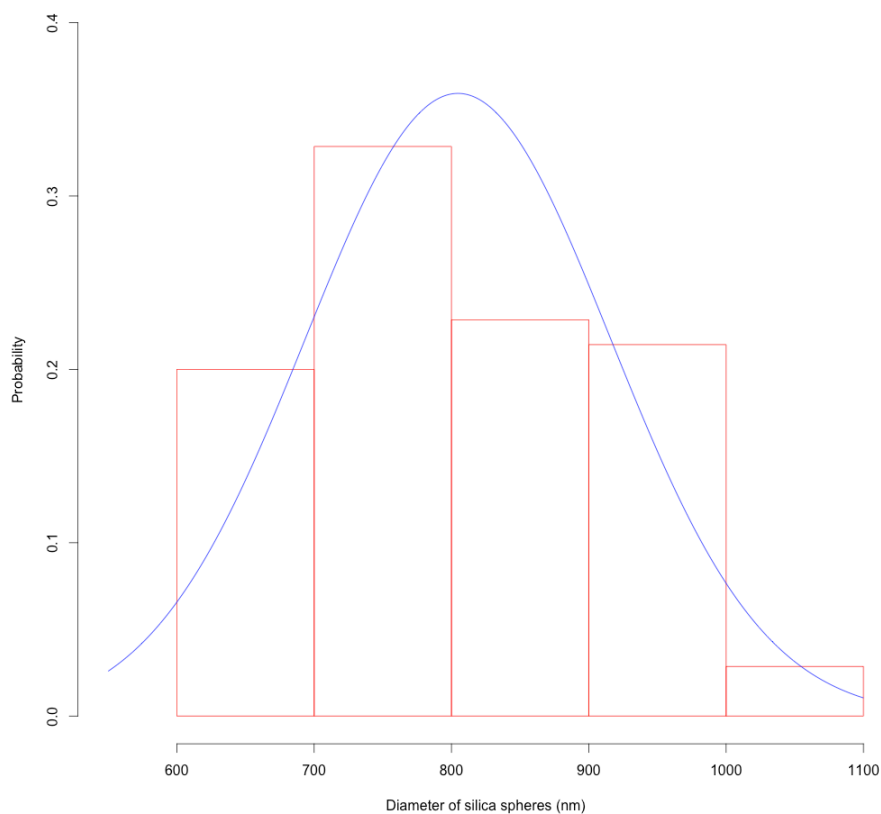

**Figure S1.** Statistical size distribution of as-synthesized smHSSs, the average diameter of silica spheres is 804.7 nm, and the standard deviation is 111.1 nm (13.8%).

**Table S1. Mixing of two reactant solutions with different chemical compositions, concentrations and flow rates for the synthesis of smHSSs.** Results for test (1) – (3): no desired smHSSs synthesized; result for test (4): smHSSs synthesized.

| <b>Solution I (Inlet 1)</b>          | <b>Solution II (Inlet 2)</b> | <b>80 <math>\mu</math>L TEOS in Ethanol</b> |
|--------------------------------------|------------------------------|---------------------------------------------|
| <b>Diluted ammonia water</b>         |                              | (1) 5 $\mu$ L/min                           |
|                                      |                              | (2) 10 $\mu$ L/min                          |
| <b>CTAB in diluted Ammonia water</b> |                              | (3) 5 $\mu$ L/min                           |
|                                      |                              | (4) 10 $\mu$ L/min                          |

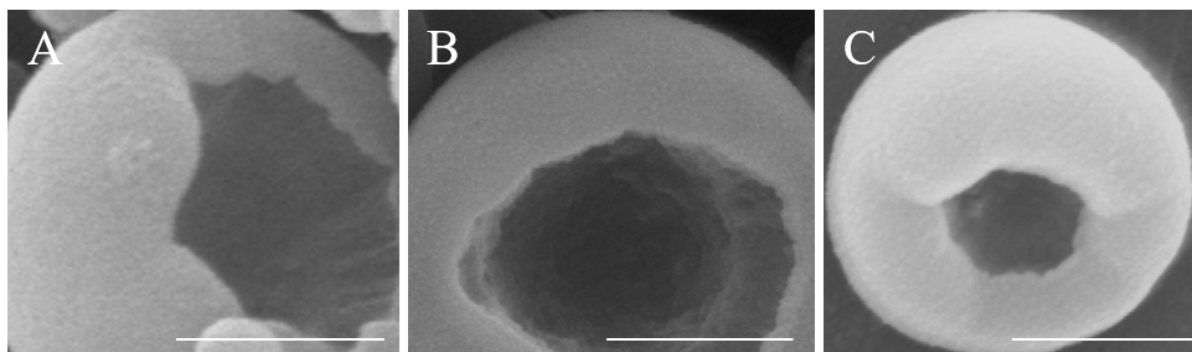

**Figure S2.** smHSSs synthesized with ammonia water of (A) 0.5 mL, (B) 1.5 mL, and (C) 3 mL, scale bars are 500 nm.

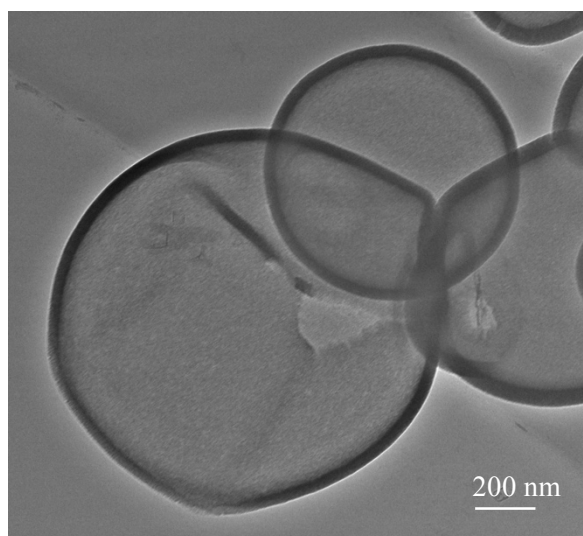

**Figure S3.** Transmission Electron Microscopy (TEM) image of smHSSs synthesized in two-run spiral microchannel.

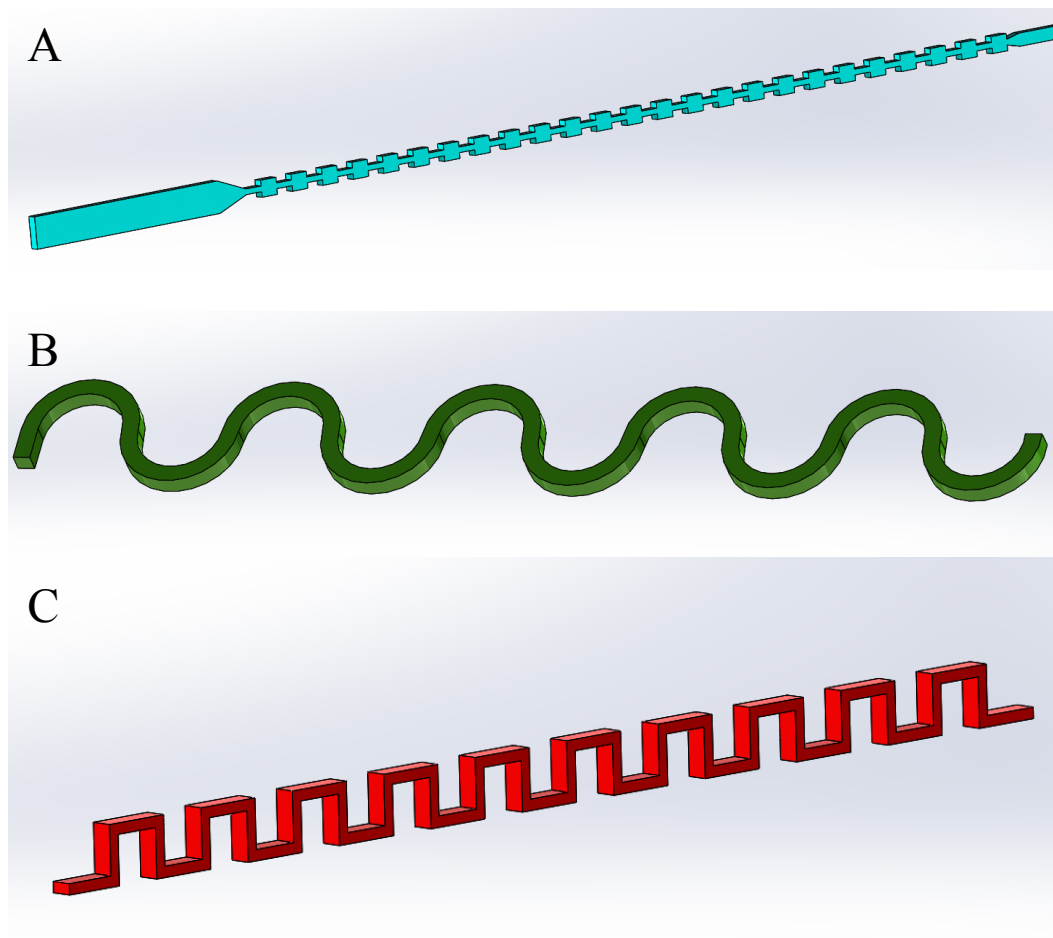

**Figure S4.** Schematic images of different channel designs: A. expansion and contraction channel; B. circular serpentine channel; and C. rectangular serpentine channel.

**Table S2.** Setup of synthesis tests with different microfluidic channel designs

| Micro channels            | Channel width ( $\mu\text{m}$ )            | Flow rate                    | Chemical solutions                                                                             |
|---------------------------|--------------------------------------------|------------------------------|------------------------------------------------------------------------------------------------|
| Spiral                    | 500                                        | 400 $\mu\text{L}/\text{min}$ | Solution I:<br>Ammonia water +<br>CTAB<br><br>Solution II: 80 $\mu\text{L}$<br>TEOS in ethanol |
| Expansion and contraction | Expansion region: 90<br>Pinched region: 30 |                              |                                                                                                |
| Circular serpentine       | 200                                        |                              |                                                                                                |
| Rectangular serpentine    | 100                                        |                              |                                                                                                |

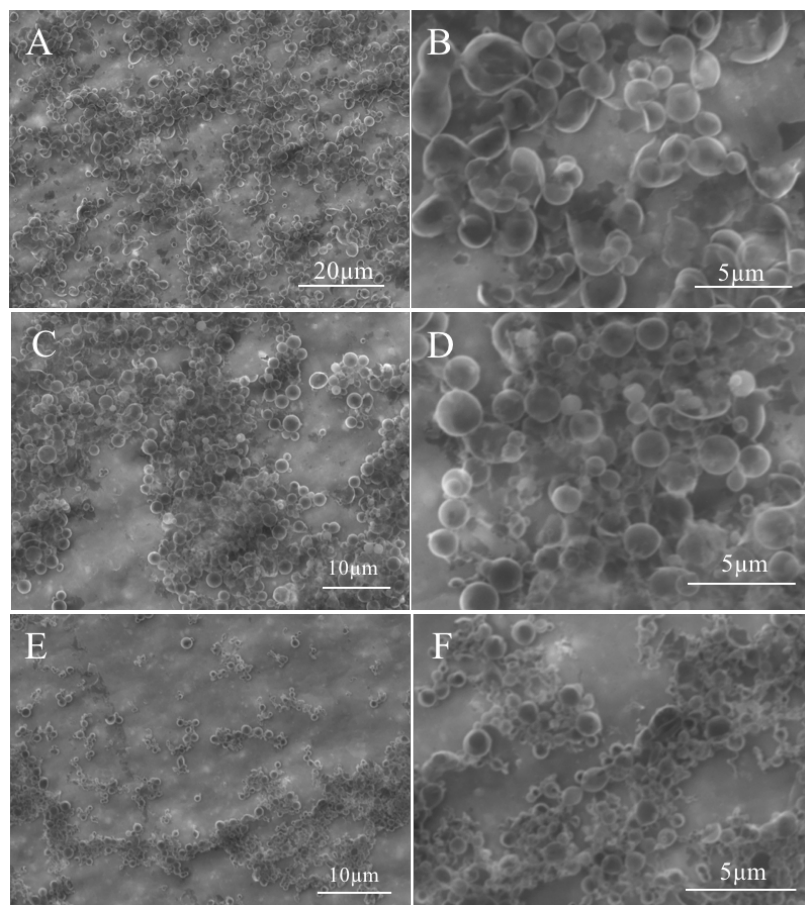

**Figure S5.** Scanning Electron Microscopy (SEM) images of smHSSs synthesized in expansion and contraction channel (A and B), circular serpentine channel (C and D), and rectangular serpentine channel (E and F).

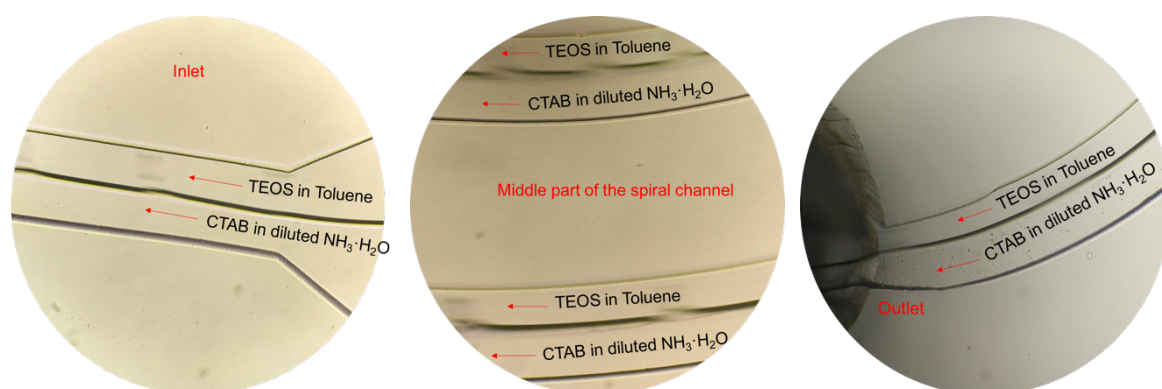

**Figure S6.** Mixing of TEOS in Toluene and CTAB in diluted ammonia water.

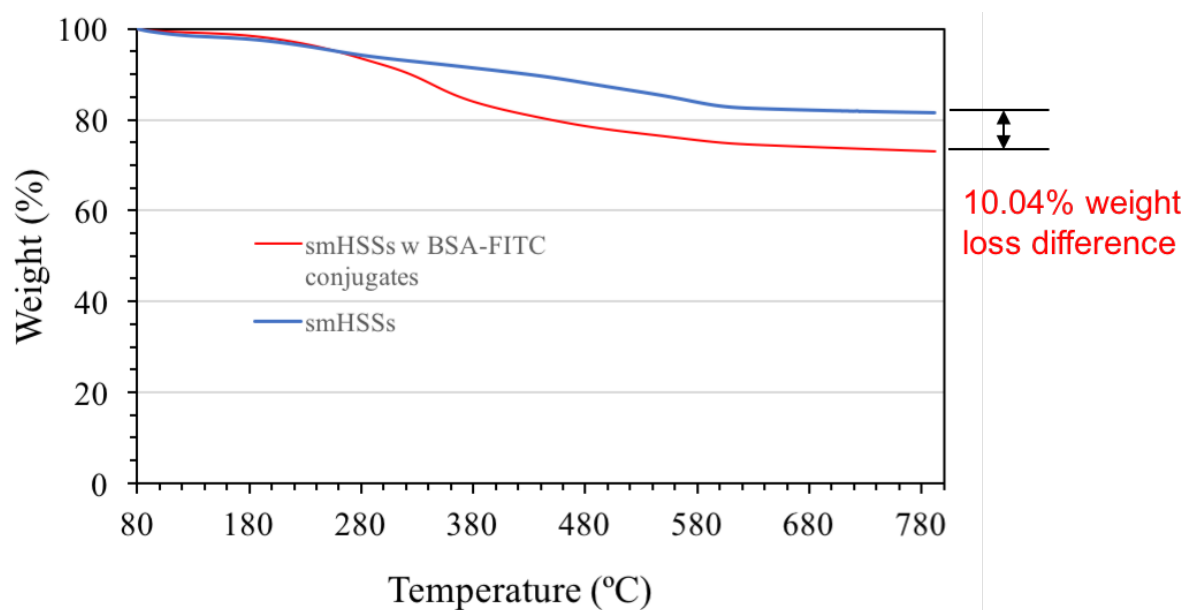

**Figure S7.** Thermogravimetric analysis (TGA) of smHSSs loaded with BSA-FITC conjugates and smHSSs.

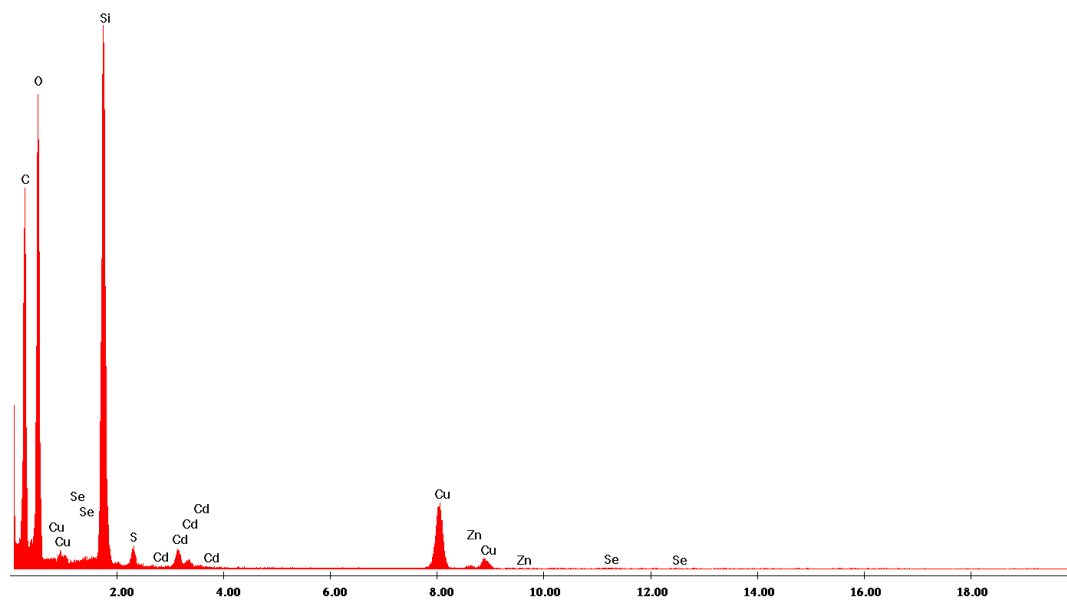

**Figure S8.** Energy-dispersive X-ray spectroscopy (EDS) analysis of multifunctional smHSSs loaded with quantum dots.

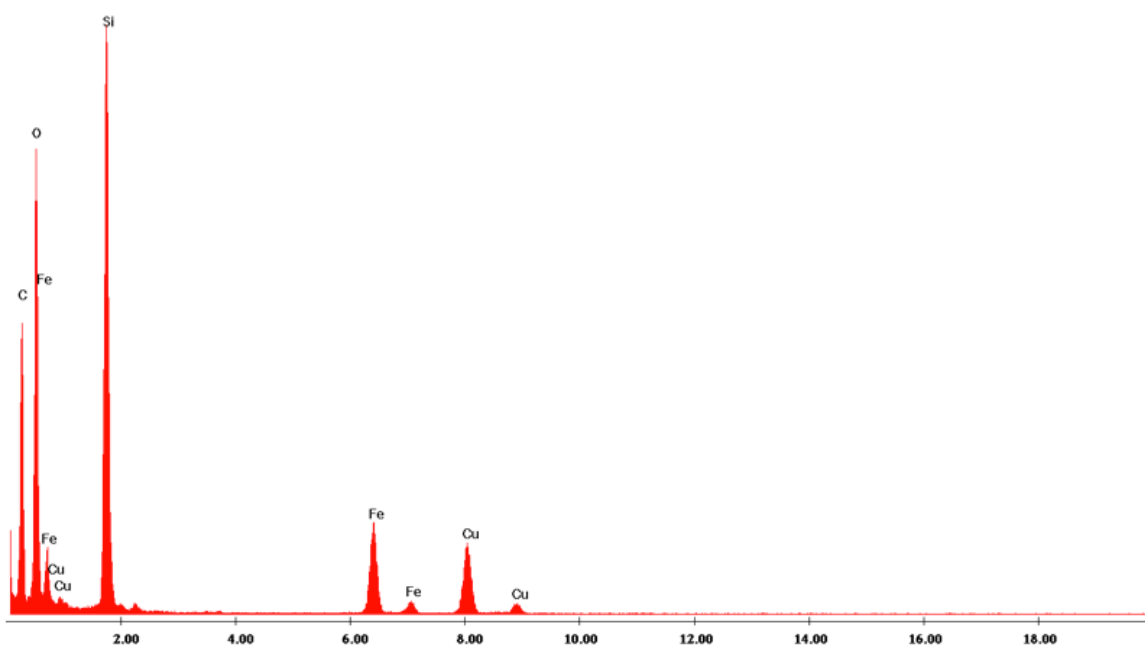

**Figure S9.** Energy-dispersive X-ray spectroscopy (EDS) analysis of multifunctional smHSSs loaded with magnetic nanoparticles.
